# Supplementary material for: Neoadjuvant endocrine therapy in locally advanced estrogen or progesterone receptor-positive breast cancer: determining the optimal endocrine agent and treatment duration in postmenopausal women—a literature review and proposed guidelines
Source: Breast Cancer Res. 2020 Jul 20;22:77. doi: 10.1186/s13058-020-01314-6 (PMC7370425; doi:10.1186/s13058-020-01314-6)
Supplement: Supplementary file 1 — Additional file 1: Table S1. OVID Medline Search Strategy. Table S2. Glossary of Terms and Definitions. Table S3. Allred Score. Table S4: Preoperative Endocrine Prognostic Index (PEPI) Calculation. [file 13058_2020_1314_MOESM1_ESM.pdf]

## Supplementary Information

*Table S1. OVID Medline Search Strategy*

| <input type="checkbox"/> | # ▲ | Searches                                          | Results | Type     |
|--------------------------|-----|---------------------------------------------------|---------|----------|
| <input type="checkbox"/> | 1   | breast neoplasms/ or unilateral breast neoplasms/ | 262225  | Advanced |
| <input type="checkbox"/> | 2   | receptors, estrogen/ or receptors, progesterone/  | 42029   | Advanced |
| <input type="checkbox"/> | 3   | Neoplasms, Hormone-Dependent/                     | 5790    | Advanced |
| <input type="checkbox"/> | 4   | hormone receptor positive breast cancer.tw.       | 676     | Advanced |
| <input type="checkbox"/> | 5   | ER+ breast cancer.tw.                             | 773     | Advanced |
| <input type="checkbox"/> | 6   | ER positive.tw.                                   | 4722    | Advanced |
| <input type="checkbox"/> | 7   | estrogen receptor positive breast cancer.tw.      | 902     | Advanced |
| <input type="checkbox"/> | 8   | ER+.tw.                                           | 64855   | Advanced |
| <input type="checkbox"/> | 9   | (ER adj3 breast cancer).tw.                       | 3461    | Advanced |
| <input type="checkbox"/> | 10  | 2 or 3 or 4 or 5 or 6 or 7 or 8 or 9              | 96542   | Advanced |
| <input type="checkbox"/> | 11  | postmenopaus*.tw.                                 | 46148   | Advanced |
| <input type="checkbox"/> | 12  | Postmenopause/                                    | 22899   | Advanced |
| <input type="checkbox"/> | 13  | 11 or 12                                          | 51022   | Advanced |
| <input type="checkbox"/> | 14  | neoadjuvant endocrine therapy.tw.                 | 155     | Advanced |
| <input type="checkbox"/> | 15  | neoadjuvant hormonal therapy.tw.                  | 327     | Advanced |
| <input type="checkbox"/> | 16  | neoadjuvant.tw.                                   | 22113   | Advanced |
| <input type="checkbox"/> | 17  | preoperative endocrine therapy.tw.                | 27      | Advanced |
| <input type="checkbox"/> | 18  | preoperative.tw.                                  | 194645  | Advanced |
| <input type="checkbox"/> | 19  | 14 or 15 or 16 or 17 or 18                        | 212835  | Advanced |
| <input type="checkbox"/> | 20  | letrozole.tw.                                     | 2098    | Advanced |
| <input type="checkbox"/> | 21  | anastrozole.tw.                                   | 1467    | Advanced |
| <input type="checkbox"/> | 22  | exemestane.tw.                                    | 1001    | Advanced |
| <input type="checkbox"/> | 23  | fulvestrant.tw.                                   | 1003    | Advanced |
| <input type="checkbox"/> | 24  | tamoxifen.tw.                                     | 19680   | Advanced |
| <input type="checkbox"/> | 25  | Aromatase Inhibitors/                             | 5732    | Advanced |
| <input type="checkbox"/> | 26  | Antineoplastic Agents, Hormonal/                  | 15363   | Advanced |
| <input type="checkbox"/> | 27  | 20 or 21 or 22 or 23 or 24 or 25 or 26            | 35159   | Advanced |
| <input type="checkbox"/> | 28  | 1 and 10 and 13 and 19 and 27                     | 170     | Advanced |

Table S2 Glossary of Terms and Definitions

| Glossary of Terms and Definitions |                                                                                                                                                                                                                                                                                                                                                                                                                                        |
|-----------------------------------|----------------------------------------------------------------------------------------------------------------------------------------------------------------------------------------------------------------------------------------------------------------------------------------------------------------------------------------------------------------------------------------------------------------------------------------|
| BCS                               | Breast conserving surgery. Also referred to as lumpectomy or partial mastectomy.                                                                                                                                                                                                                                                                                                                                                       |
| ER                                | Estrogen receptor.                                                                                                                                                                                                                                                                                                                                                                                                                     |
| LABC                              | Locally advanced breast cancer. Locally advanced breast cancer is defined as tumors that are >50mm in size or involve the skin of the breast/chest wall, multiple axillary lymph nodes or the supra/infraclavicular lymph nodes [1].                                                                                                                                                                                                   |
| NCT                               | Neoadjuvant chemotherapy.                                                                                                                                                                                                                                                                                                                                                                                                              |
| NET                               | Neoadjuvant endocrine therapy. This includes tamoxifen, fulvestrant and aromatase inhibitors (letrozole, anastrozole, exemestane).                                                                                                                                                                                                                                                                                                     |
| ORR                               | Objective response rate. This is usually calculated according to the Response Evaluation Criteria in Solid Tumors (RECIST) [3]. The 4 RECIST categories are complete response (CR), partial response (PR), progressive disease (PD) and stable disease (SD) [4]. CR is defined as complete disappearance of the tumor and reduction in pathological lymph nodes to <10mm [4]. PR is defined as $\geq 30\%$ reduction in the tumor [4]. |
| pCR                               | Pathological complete response. This is defined as complete absence of the cancer from the breast and the regional lymph nodes.                                                                                                                                                                                                                                                                                                        |
| PEPI                              | Preoperative endocrine prognostic index. Calculation and components are discussed in <i>Appendix 3</i> .                                                                                                                                                                                                                                                                                                                               |
| PgR                               | Progesterone receptor.                                                                                                                                                                                                                                                                                                                                                                                                                 |
| RFS                               | Relapse free survival. This refers to the length of time following treatment that the patient remains free of signs and symptoms of the disease.                                                                                                                                                                                                                                                                                       |

*Table S3: Allred Score*

The Allred Score is used to determine the ER status of a tumor and has a sensitivity of 99.4% and a specificity of 99.5% [2].

A table showing the calculation of the ER Allred Score is included for your reference:

| Proportion Score (PS) | Observation Estimate | Intensity Score (IS) | Observation Estimate |
|-----------------------|----------------------|----------------------|----------------------|
| 0                     | No staining          | 0                    | No staining          |
| 1                     | 1%                   | 1                    | Weak                 |
| 2                     | 1-10%                | 2                    | Intermediate         |
| 3                     | 10-33%               | 3                    | Strong               |
| 4                     | 33-36%               | -                    | -                    |
| 5                     | 66-100%              | -                    | -                    |

ER Allred Score = Sum of Proportion Score (PS) and Intensity Score (IS)

| Total Score | ER Status of the Tumor |
|-------------|------------------------|
| 0-2         | Negative               |
| 3-8         | Positive               |

Table adapted from Qureshi and Pervez, 2010 [2].

*Table S4: Preoperative Endocrine Prognostic Index (PEPI) Calculation*

The PEPI is calculated using tumor size, nodal status, Ki67 level and ER status (Allred score) of the post-neoadjuvant therapy surgical specimen [4, 5].

The 3 possible PEPI score categories are 0, 1-3 and  $\geq 4$  [5]. A table summarizing the PEPI calculation is included below for your reference:

| <b>Tumor Characteristics at Surgery</b> | <b>RFS HR</b> | <b>PEPI Score Allocation</b> |
|-----------------------------------------|---------------|------------------------------|
| <b>Tumor Size</b>                       |               |                              |
| <b>T1/2</b>                             | -             | 0                            |
| <b>T3/4</b>                             | 2.8           | 3                            |
| <b>Nodal Status</b>                     |               |                              |
| <b>Negative</b>                         | -             | 0                            |
| <b>Positive</b>                         | 3.2           | 3                            |
| <b>Ki67 Level</b>                       |               |                              |
| <b>0 to 2.7%</b>                        | -             | 0                            |
| <b>&gt;2.7% to 7.3%</b>                 | 1.3           | 1                            |
| <b>&gt;7.3% to 19.7%</b>                | 1.7           | 1                            |
| <b>&gt;19.7% to 53.1%</b>               | 2.2           | 2                            |
| <b>&gt;53.1%</b>                        | 2.9           | 3                            |
| <b>ER Status</b>                        |               |                              |
| <b>Negative</b>                         | 2.8           | 3                            |
| <b>Positive</b>                         | 0             | 0                            |

*RFS = Relapse Free Survival*

*HR = Hazard Ratio*

*Table adapted from Ma et. al, 2015 [4].*

The scores from the 4 categories are added to give the total PEPI score and hence determine relapse risk.

*Note:* The ER status (negative or positive) is determined based on the Allred scoring system which is described in Table S3.

## References

1. Yalcin B: Overview on locally advanced breast cancer: defining, epidemiology, and overview on neoadjuvant therapy. *Exp Oncol* 2013, 35(4):250-252.
2. Qureshi A, Pervez S: Allred scoring for ER reporting and it's impact in clearly distinguishing ER negative from ER positive breast cancers. *J Pak Med Assoc* 2010, 60(5):350-353.
3. Carpenter R, Doughty JC, Cordiner C, Moss N, Gandhi A, Wilson C, Andrews C, Ellis G, Gui G, Skene AI: Optimum duration of neoadjuvant letrozole to permit breast conserving surgery. *Breast Cancer Res Treat* 2014, 144(3):569-576.
4. Ma CX, Reinert T, Chmielewska I, Ellis MJ: Mechanisms of aromatase inhibitor resistance. *Nat Rev Cancer* 2015, 15(5):261-275.
5. Ellis MJ, Tao Y, Luo J, A'Hern R, Evans DB, Bhatnagar AS, Chaudri Ross HA, von Kameke A, Miller WR, Smith I, Eiermann W, Dowsett M: Outcome prediction for estrogen receptor-positive breast cancer based on postneoadjuvant endocrine therapy tumor characteristics. *J Natl Cancer Inst* 2008, 100(19):1380-1388.
